# Supplementary material for: Mining for Active Molecules in Probiotic Supernatant by Combining Non-Targeted Metabolomics and Immunoregulation Testing
Source: MDPI journal article supplement (doi:10.3390/metabo12010035), 2022-01-04
Supplement: s1 [file s1]

**Table S1:** Instrumental parameters used for the analyses of cell-free supernatant extracts. Single MS acquisition mode and ESI ionization.

| Parameters                   | (-) FT-ICR-MS   | (+) FT-ICR-MS   |
|------------------------------|-----------------|-----------------|
| <i>HLB and CN-E extracts</i> |                 |                 |
| Mass range                   | 147.4 – 2000 Da | 147.4 – 1500 Da |
| Source accumulation          | 0.01 sec        | 0.05 sec        |
| Ion accumulation time        | 0.30 sec        | 0.50 sec        |
| Acquired scans               | 500             | 300             |
| Capillary voltage            | 4000 V          | 4000 V          |
| Drying gas flow rate         | 4.0 L/min       | 4.0 L/min       |
| Drying gas temperature       | 180 °C          | 200 °C          |
| Nebulizer gas flow rate      | 1.0 bar         | 1.0 bar         |
| Spray shield                 | -500 V          | -500 V          |
| Excitation pulse time        | 5.0 µsec        | 5.0 µsec        |
| Analyzer entrance            | 4.0 V           | -5.0 V          |
| Sidekick offset              | 1.5 V           | -1.5 V          |
| Trap                         | -20 V           | 20 V            |
| Front trap plate             | -0.4 V          | 0.4 V           |
| Back trap plate              | -0.5 V          | 0.5 V           |
| Transient time domain        | 2 MW            | 2 MW            |
| Syringe flow rate            | 120 µL/h        | 240 µL/h        |
| Run time                     | 10.0 min        | 10.0 min        |
| <i>Crude supernatants</i>    |                 |                 |
| Mass range                   | 73.7 – 1000 Da  | 73.7 – 1000 Da  |
| Source accumulation          | 0.01 sec        | 0.01 sec        |
| Ion accumulation time        | 0.30 sec        | 0.30 sec        |
| Acquired scans               | 500             | 400             |
| Capillary voltage            | 3600 V          | 3600 V          |
| Drying gas flow rate         | 4.0 L/min       | 4.0 L/min       |
| Drying gas temperature       | 180 °C          | 180 °C          |
| Nebulizer gas flow rate      | 2.0 bar         | 2.0 bar         |
| Spray shield                 | -500 V          | -500 V          |
| Excitation pulse time        | 15.0 µsec       | 15.0 µsec       |
| Analyzer entrance            | 4.0 V           | -10.0 V         |
| Sidekick offset              | 10.0 V          | -1.5 V          |
| Trap                         | -20 V           | 20 V            |
| Front trap plate             | -0.4 V          | 0.4 V           |
| Back trap plate              | -0.5 V          | 0.5 V           |
| Transient time domain        | 2 MW            | 2 MW            |
| Syringe flow rate            | 120 µL/h        | 120 µL/h        |
| Run time                     | 10.0 min        | 10.0 min        |
